# Supplementary material
Source: HighWire-hosted journal article supplement (https://www.annfammed.org/highwire/filestream/646/field_highwire_adjunct_files/0/Pantell_Supp_Table_2b.pdf)
Supplement: Pantell_Supp_Table_2b.pdf [file Pantell_Supp_Table_2b.pdf]

**Supplemental materials for:**

Pantell MS, De Marchis E, Bueno A, Gottlieb LM. Practice capacity to address patients' social needs and physician satisfaction and perceived quality of care. *Ann Fam Med*. 2019;17(1):42-45.

**Supplemental Table 2b. Odds Ratios of Physician Outcomes Based on Capacity to Address Patient Social Needs Using Multiple Imputation for All Missing Variables Except Sex and Outcome Variables (N = 890)**

|                                             | Coordination of Patient Care with Social Services or Other Community Providers Is Easy |           |                |         |           |                |         |           |                |
|---------------------------------------------|----------------------------------------------------------------------------------------|-----------|----------------|---------|-----------|----------------|---------|-----------|----------------|
|                                             | Model 1                                                                                |           |                | Model 2 |           |                | Model 3 |           |                |
|                                             | OR                                                                                     | CI        | <i>P</i> value | OR      | CI        | <i>P</i> value | OR      | CI        | <i>P</i> value |
| Job satisfaction                            |                                                                                        |           |                |         |           |                |         |           |                |
| Very satisfied                              | 2.79                                                                                   | 1.39-5.60 | .004           | 2.61    | 1.27-5.35 | .009           | 2.75    | 1.33-5.67 | .006           |
| Satisfied                                   | 2.15                                                                                   | 1.12-4.13 | .021           | 2.12    | 1.08-4.16 | .029           | 2.21    | 1.12-4.35 | .022           |
| Somewhat dissatisfied                       | 1.29                                                                                   | 0.66-2.54 | .458           | 1.25    | 0.62-2.50 | .532           | 1.30    | 0.65-2.61 | .464           |
| Very dissatisfied                           | Ref                                                                                    | -         | -              | Ref     | -         | -              | Ref     | -         | -              |
| Job stress                                  |                                                                                        |           |                |         |           |                |         |           |                |
| No stress                                   | 1.68                                                                                   | 0.95-2.97 | .073           | 1.39    | 0.76-2.53 | 0.284          | 1.46    | 0.80-2.69 | .217           |
| Moderately stressed                         | 1.42                                                                                   | 0.91-2.22 | .120           | 1.31    | 0.83-2.08 | 0.250          | 1.36    | 0.85-2.16 | .201           |
| Very stressed                               | 1.16                                                                                   | 0.73-1.85 | .535           | 1.09    | 0.68-1.77 | 0.715          | 1.11    | 0.68-1.79 | .680           |
| Extremely stressed                          | Ref                                                                                    | -         | -              | Ref     | -         | -              | Ref     | -         | -              |
| Satisfied w/ income                         |                                                                                        |           |                |         |           |                |         |           |                |
| Very satisfied                              | 2.12                                                                                   | 1.19-3.77 | .010           | 2.33    | 1.25-4.34 | 0.008          | 2.28    | 1.22-4.26 | .009           |
| Satisfied                                   | 1.89                                                                                   | 1.14-3.12 | .013           | 2.04    | 1.19-3.49 | 0.009          | 2.02    | 1.18-3.45 | .011           |
| Somewhat dissatisfied                       | 0.99                                                                                   | 0.57-1.74 | .980           | 0.99    | 0.55-1.78 | 0.971          | 0.97    | 0.54-1.75 | .923           |
| Very dissatisfied                           | Ref                                                                                    | -         | -              | Ref     | -         | -              | Ref     | -         | -              |
| Satisfied w/ income relative to specialists |                                                                                        |           |                |         |           |                |         |           |                |
| Very satisfied                              | 3.01                                                                                   | 1.69-5.36 | .000           | 3.13    | 1.70-5.74 | 0.000          | 3.08    | 1.67-5.67 | .000           |

|                                               |      |           |      |      |           |       |      |           |      |
|-----------------------------------------------|------|-----------|------|------|-----------|-------|------|-----------|------|
| Satisfied                                     | 2.13 | 1.44-3.15 | .000 | 2.13 | 1.41-3.21 | 0.000 | 2.15 | 1.42-3.25 | .000 |
| Somewhat dissatisfied                         | 1.71 | 1.22-2.41 | .002 | 1.75 | 1.22-2.51 | 0.002 | 1.74 | 1.21-2.49 | .003 |
| Very dissatisfied                             | Ref  | -         | -    | Ref  | -         | -     | Ref  | -         | -    |
| Satisfied w/ amount of time spent w/ patients |      |           |      |      |           |       |      |           |      |
| Very satisfied                                | 3.89 | 1.94-7.81 | .000 | 3.42 | 1.64-7.10 | 0.001 | 3.39 | 1.63-7.06 | .001 |
| Satisfied                                     | 2.79 | 1.61-4.82 | .000 | 2.63 | 1.49-4.63 | .001  | 2.69 | 1.52-4.78 | .001 |
| Somewhat dissatisfied                         | 2.07 | 1.19-3.63 | .011 | 2.13 | 1.20-3.79 | .010  | 2.12 | 1.19-3.79 | .011 |
| Very dissatisfied                             | Ref  | -         | -    | Ref  | -         | -     | Ref  | -         | -    |
| Patient medical care received is improving    | 1.60 | 1.18-2.18 | .003 | 1.67 | 1.21-2.31 | .002  | 1.66 | 1.20-2.30 | .002 |

OR = Odds ratio.

Model 1 covariates: None.

Model 2 covariates: Age, sex, era training completed, specialty, clinic location, region of country, clinic part of integrated provider network, full-time equivalent providers in practice.

Model 3 covariates: Model 2 covariates plus frequency practice sees patients with social needs.
